# Supplementary material for: Volatile atmospheric pressure chemical ionisation mass spectrometry headspace analysis ofE. coliandS. aureus
Source: Royal Society of Chemistry journal article supplement (doi:10.1039/d1ay01555a), 2021-01-01

## Supplementary Information

### Volatile atmospheric pressure chemical ionisation mass spectrometry headspace analysis of *E. coli* and *S. aureus*

Kerry Rosenthal<sup>1</sup>, Eugenie Hunsicker<sup>2</sup>, Elizabeth Ratcliffe<sup>3</sup>, Martin R. Lindley<sup>1,4</sup>, Joshua Leonard<sup>5</sup>, Jack R. Hitchens<sup>5</sup>, Matthew A Turner<sup>4,5</sup>.

<sup>1</sup> School of Sport, Exercise & Health Sciences, Loughborough University, Loughborough, UK

<sup>2</sup> Department of Mathematical Sciences, Loughborough University, Loughborough, UK

<sup>3</sup> Department of Chemical Engineering, Loughborough University, Loughborough, UK

<sup>4</sup> Translational Chemical Biology Research Group

<sup>5</sup> Department of Chemistry, Loughborough University, Loughborough, UK

E-mail: m.r.lindley@lboro.ac.uk

#### Contents

|                  |   |
|------------------|---|
| Figure S1.....   | 2 |
| Figure S2.....   | 3 |
| Figure S3.....   | 4 |
| Figure S4a.....  | 5 |
| Figure S4b. .... | 6 |
| Figure S5a.....  | 7 |
| Figure S5b. .... | 8 |
| Table S1.....    | 9 |
| Figure S6.....   | 9 |

**Figure S1.** Total intensity count over the 5-min sampling period for three randomly chosen samples for each class in each experiment; dataset 1 5-min samples on normal agar, dataset 2 5-min samples on normal agar, and dataset 2 5-min samples on blood agar. Colours are simply to show the three separate samples for each class.

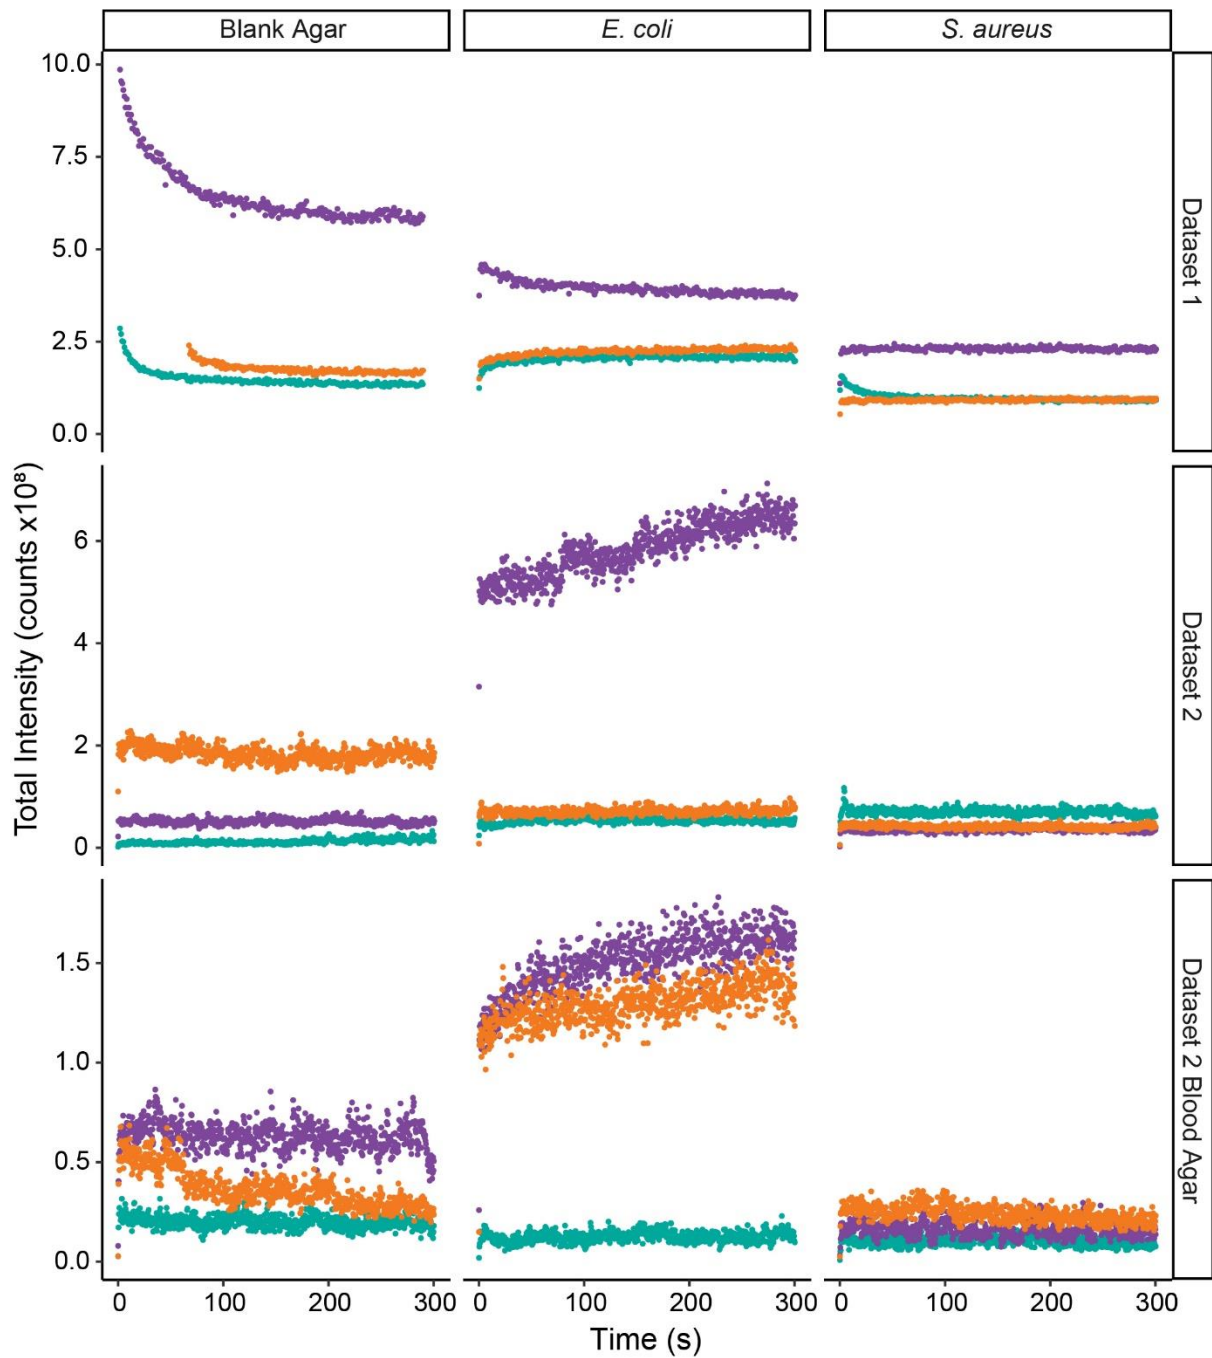

**Figure S2.** The  $m/z$  118 intensity count for each scan over the 5-min sampling period for an example *E. coli* sample. One-minute's worth of scans (60/scan rate) were summed. The turquoise points show the first set of scans selected. The values for those same scans were summed separately for each  $m/z$  bin. Then the process was repeated 200 times (orange points, purple points; this figure only shows three times). The scans were selected entirely at random each time and the same scans could be selected more than once.

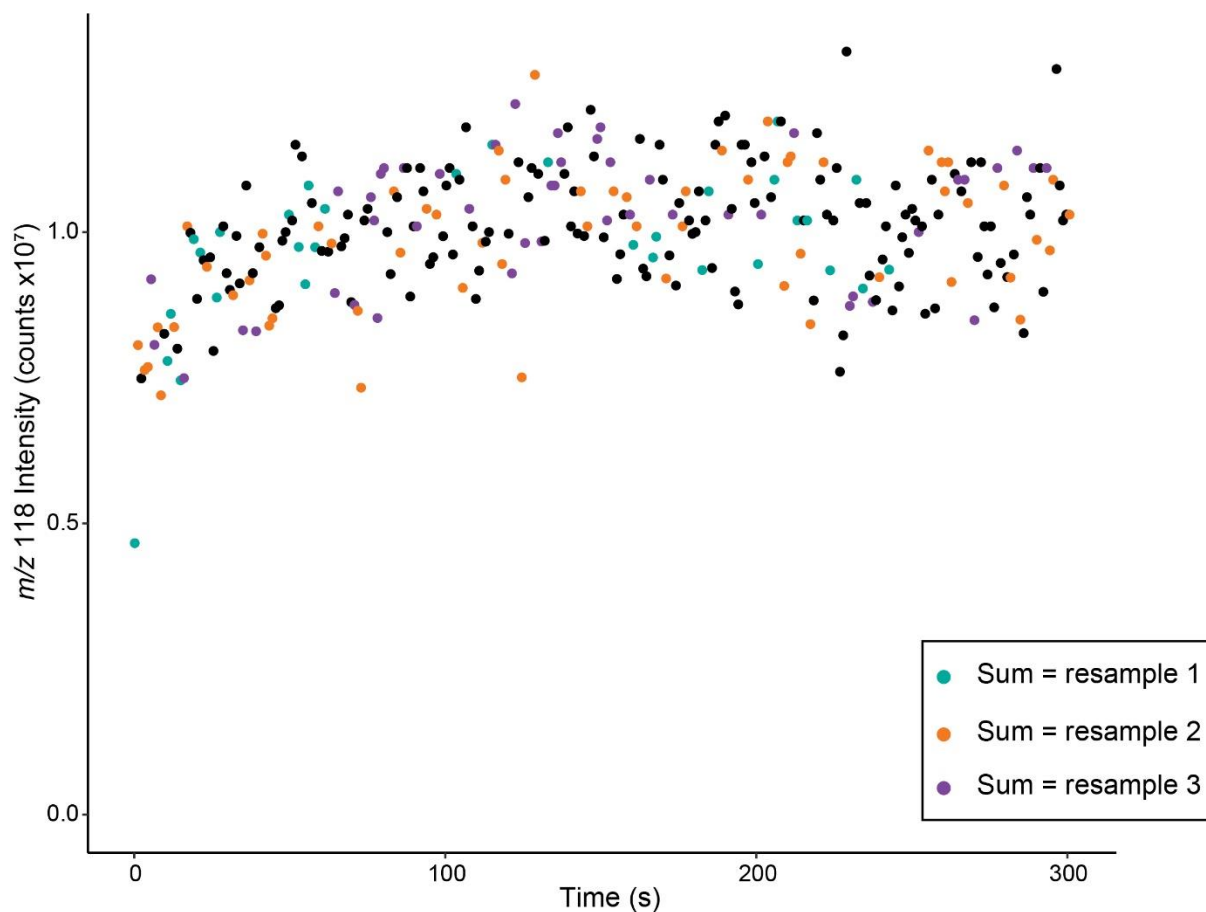

**Figure S3.** Mean (SD) of *E. coli* (black triangles), *S. aureus* (black crosses), and blank agar (white circles) intensity counts of dataset 2 samples for  $m/z$  118 and  $m/z$  231.

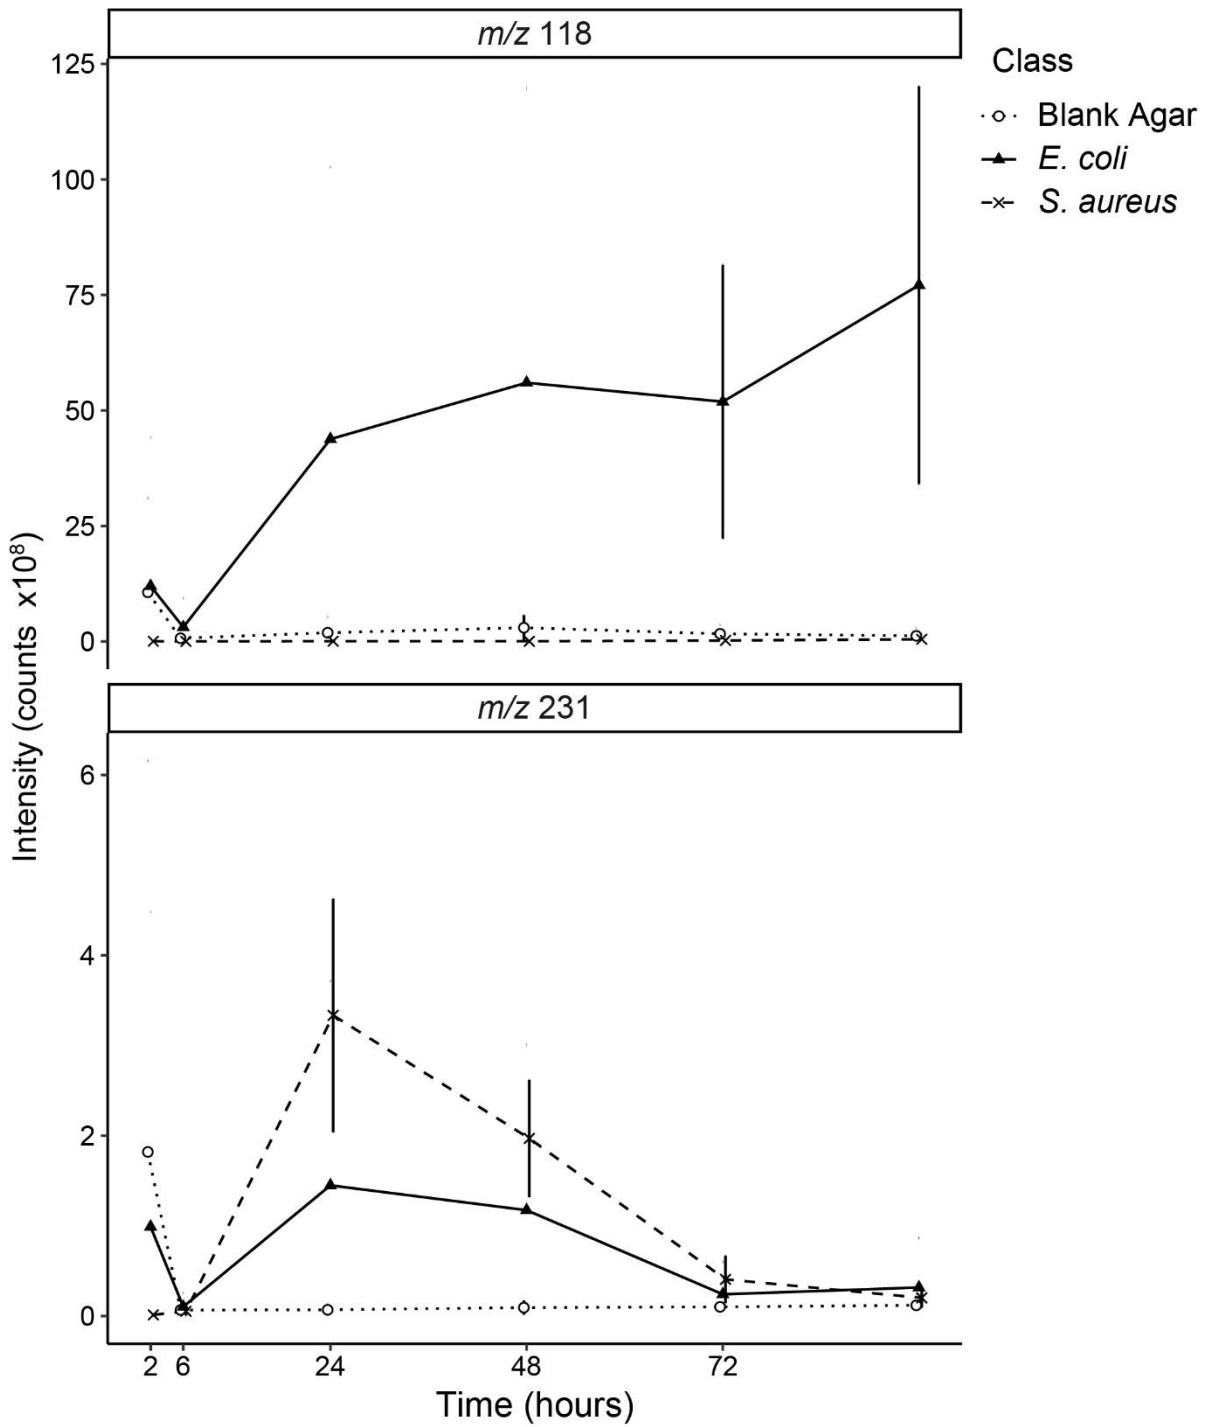

**Figure S4a.** Selected variables (\*) for each of the four *E. coli* datasets, with the highest median signal-to-noise ratio across time points indicated by the gradient.

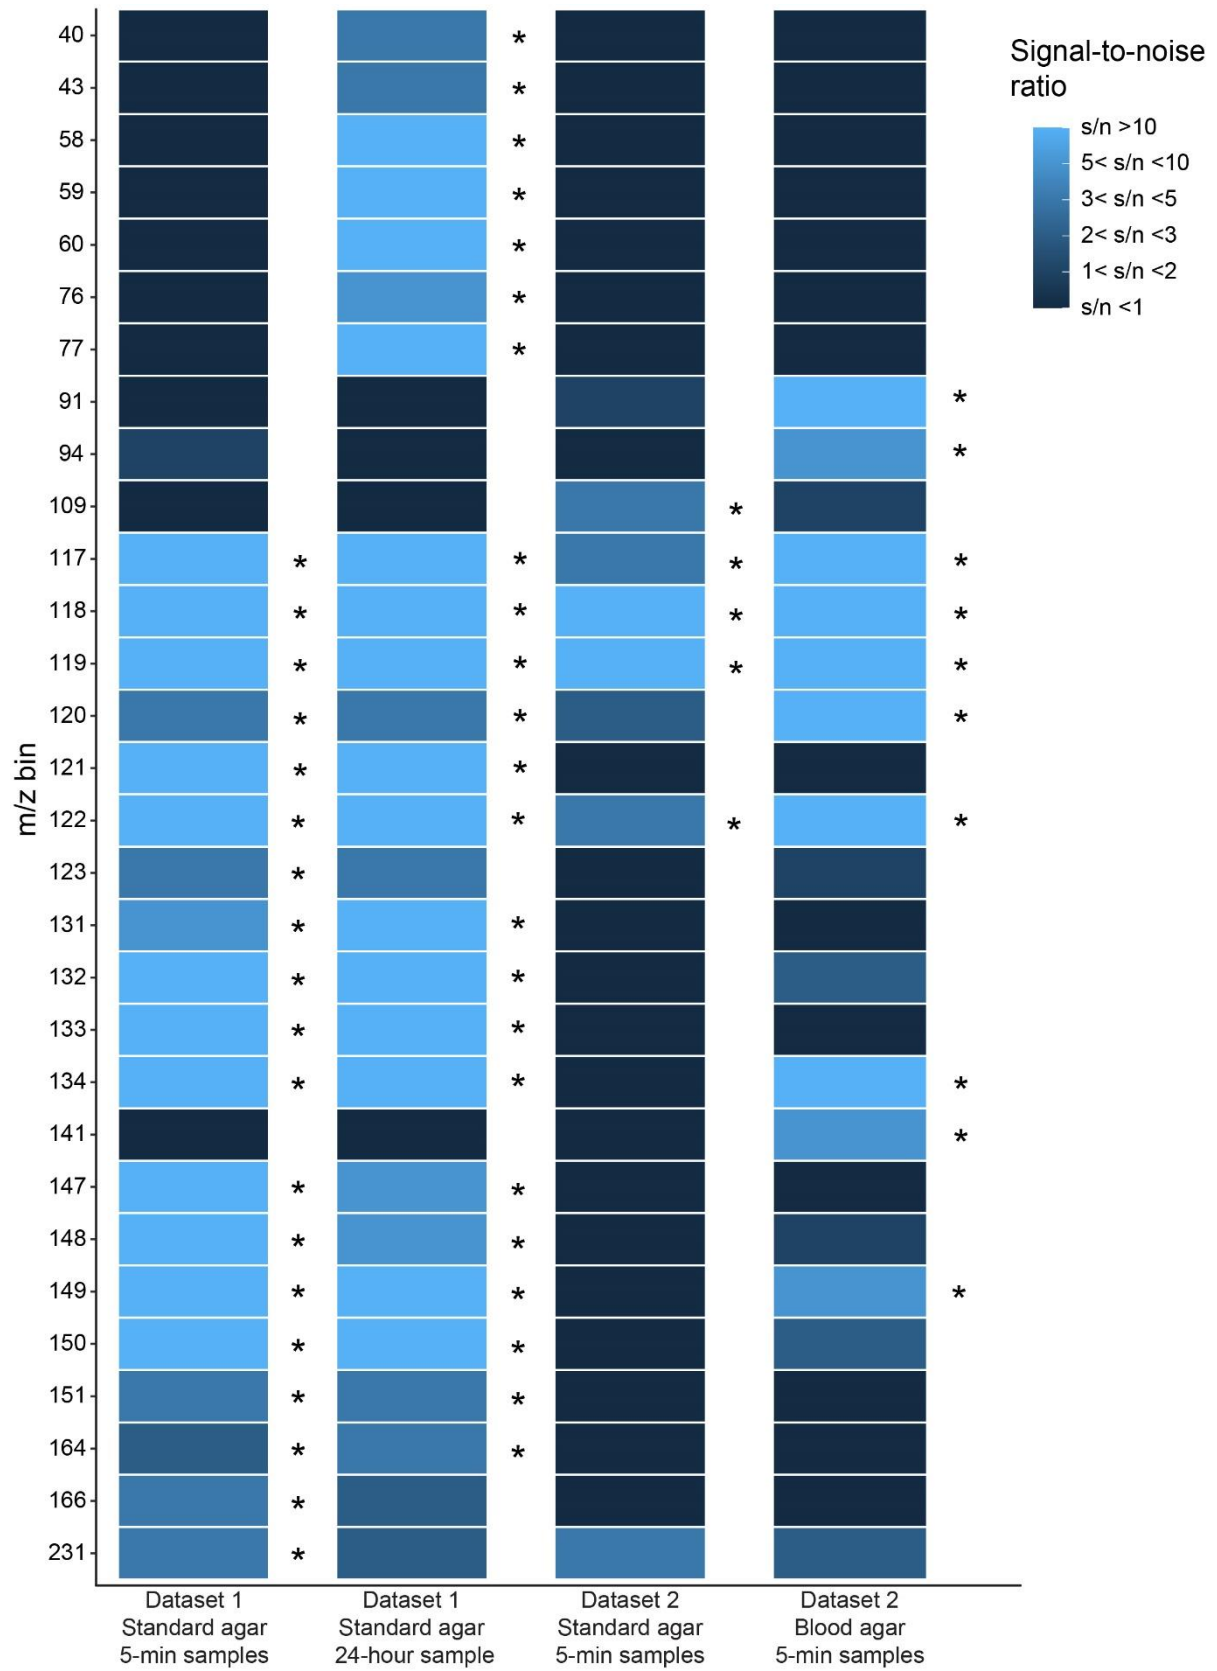

**Figure S4b.** Selected variables (\*) for each of the four *S. aureus* datasets, with the highest median signal-to-noise ratio across time points indicated by the gradient.

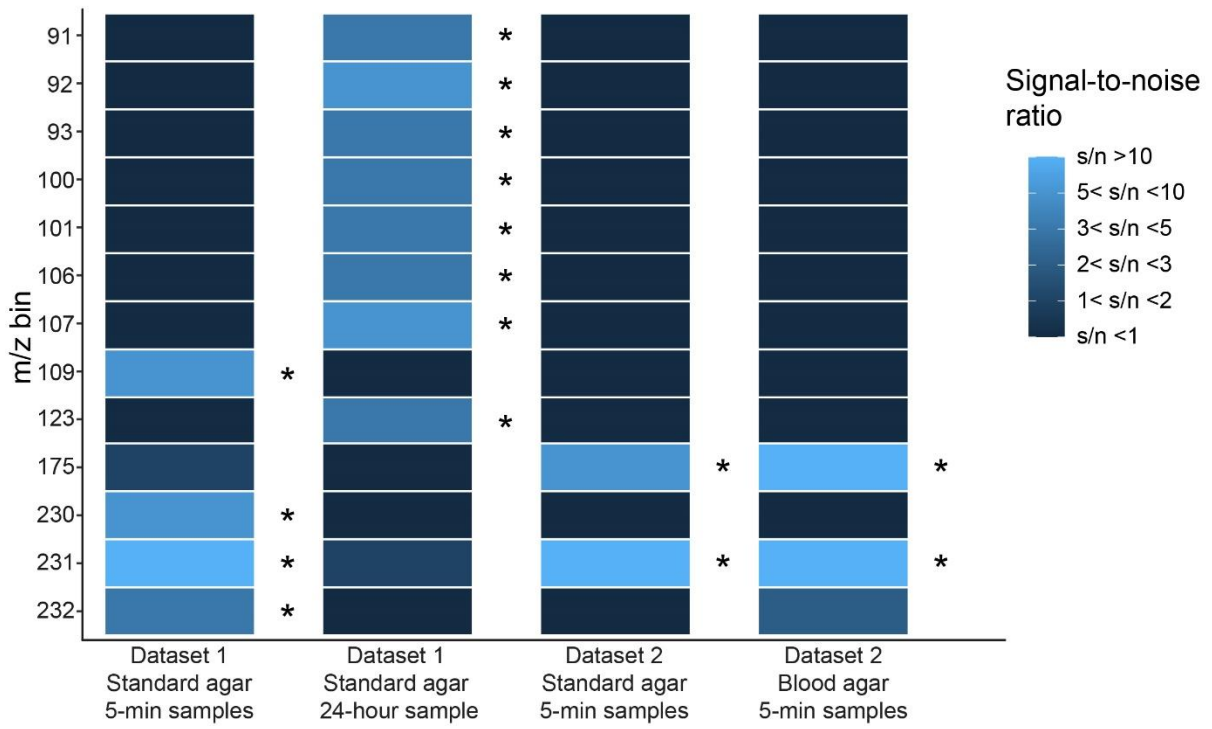

**Figure S5a.** Plots of the 24-hour continuous *E. coli* sample (mean of the resamples for each 5 minute section) for the variables (labelled above each plot) not selected by any other method.

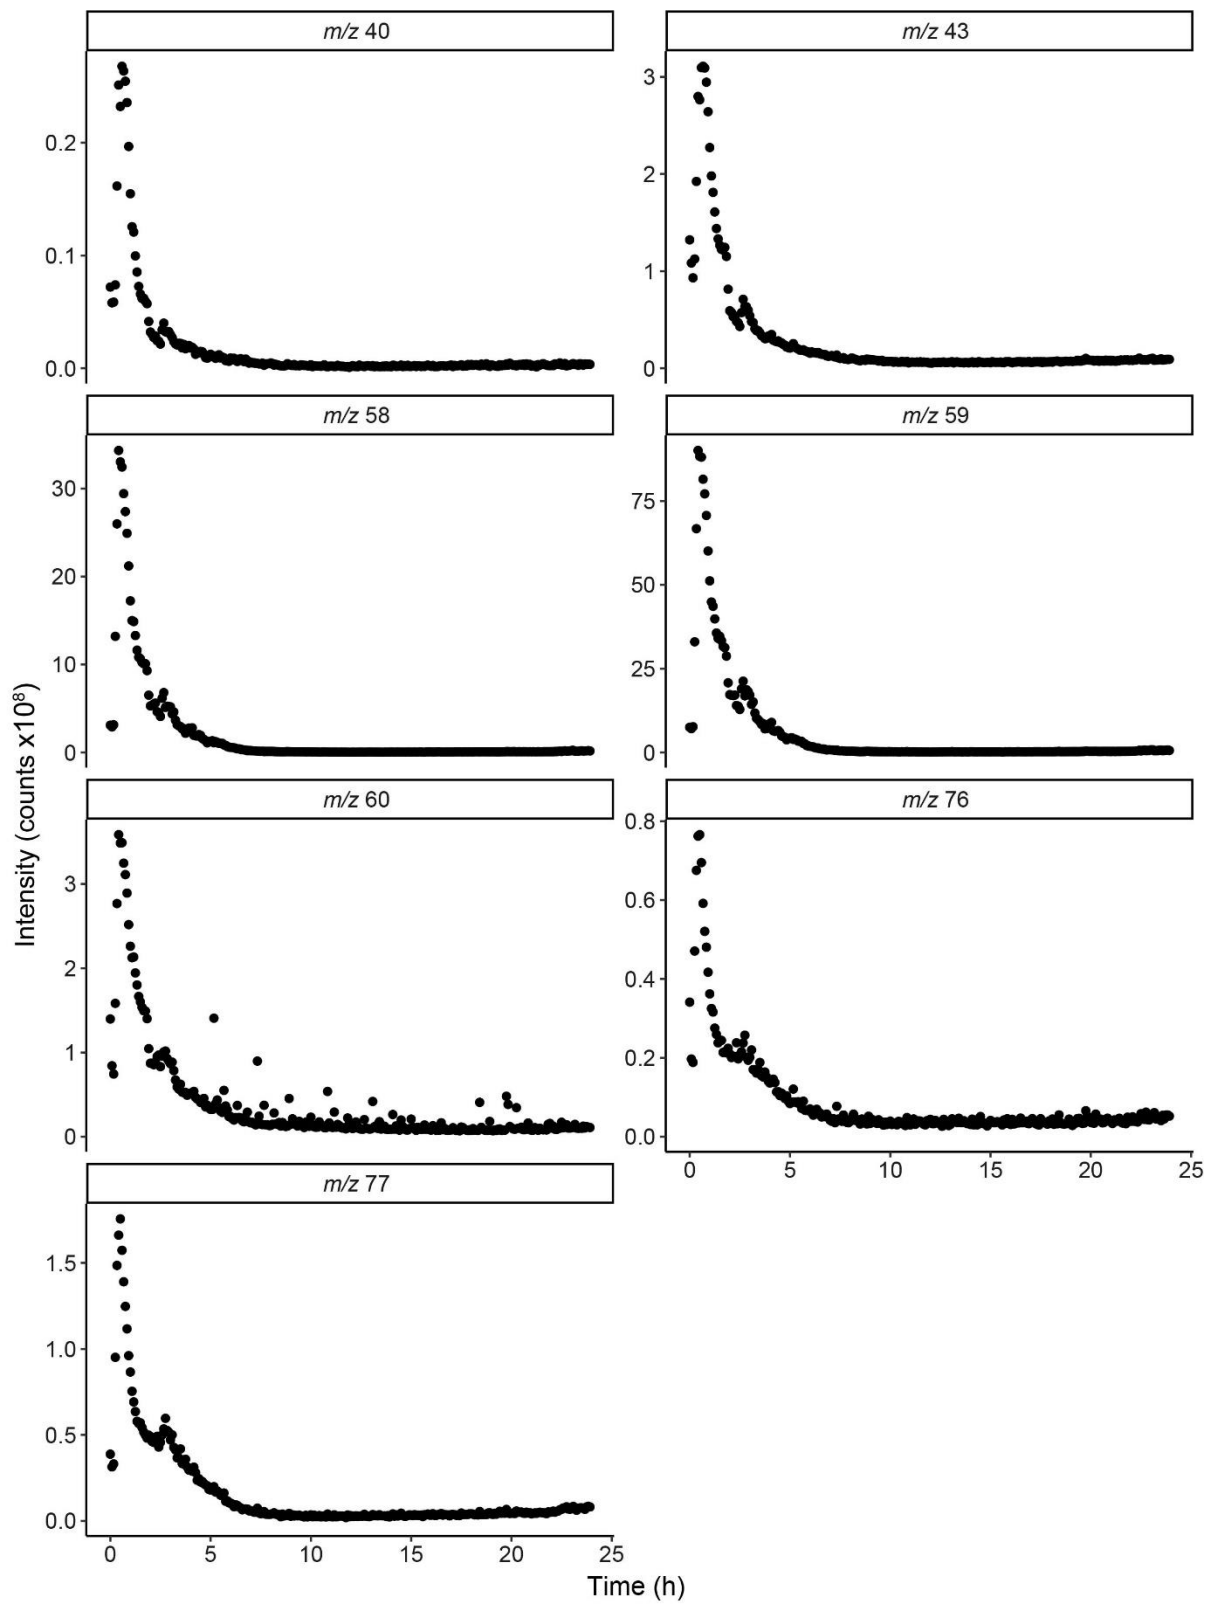

**Figure S5b.** Plots of the 24-hour continuous *S. aureus* sample (mean of the resamples for each 5 minute section) for the variables (labelled above each plot) not selected by any other method.

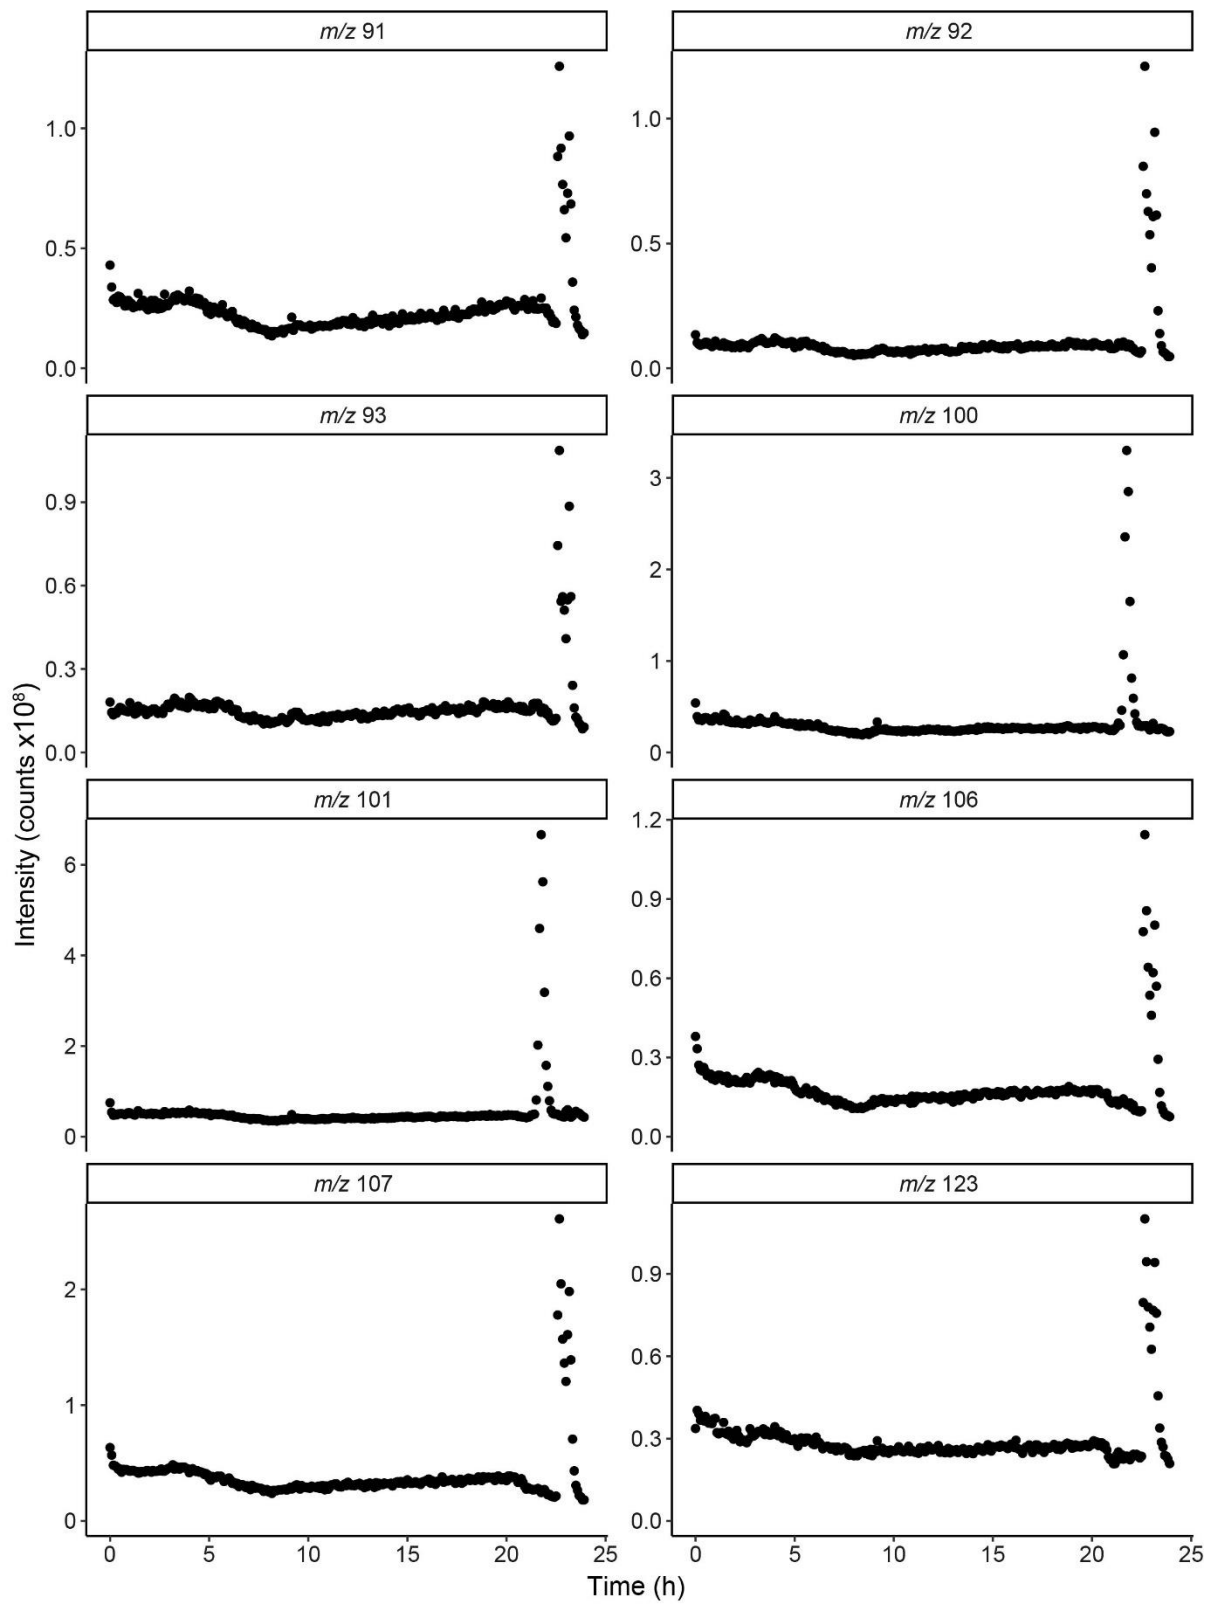



**Table S1.** Coefficients for the classification model. Values are rounded to two decimal places.

|                  | Intercept | <i>m/z</i> 118 | <i>m/z</i> 231 |
|------------------|-----------|----------------|----------------|
| <i>E. coli</i>   | 4.17      | 5.36           | 7.84           |
| <i>S. aureus</i> | -726.07   | -1308.57       | 27.58          |

**Figure S6.** Youden's index for the classification model, separated by set, time and class (white circles: blank agar, black triangles: *E. coli*, black crosses: *S. aureus*) with a value of one indicating perfect identification, with no false negatives or false positives.

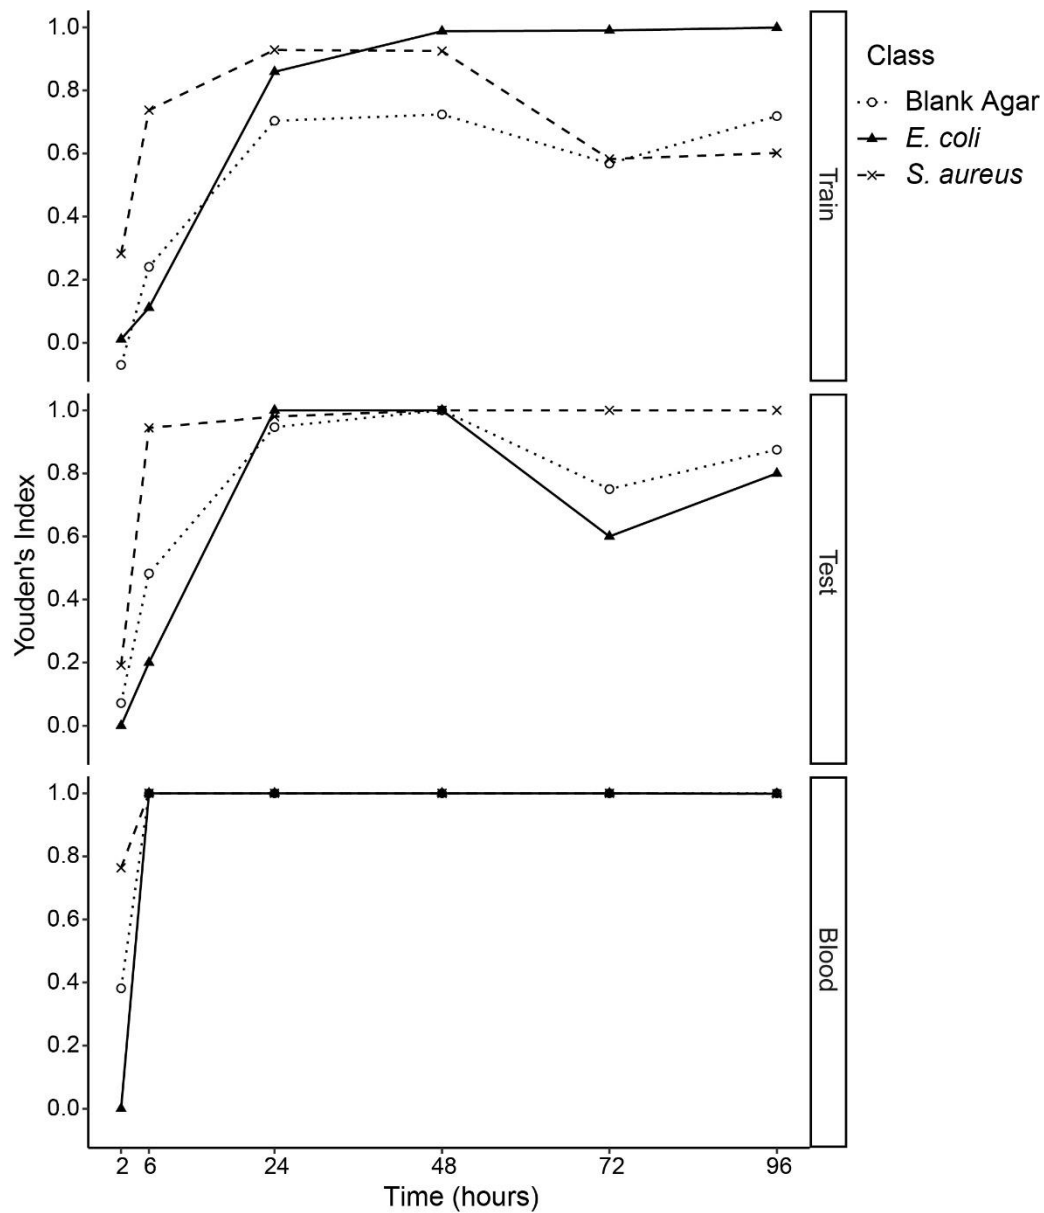

Supplement: d1ay01555a1.pdf [file d1ay01555a1.pdf]
